# Supplementary material
Source: Springer Nature journal article supplement (https://www.springermedizin.de/resource/supplementary/40164_2012_18_MOESM1_ESM.pdf/9687012)

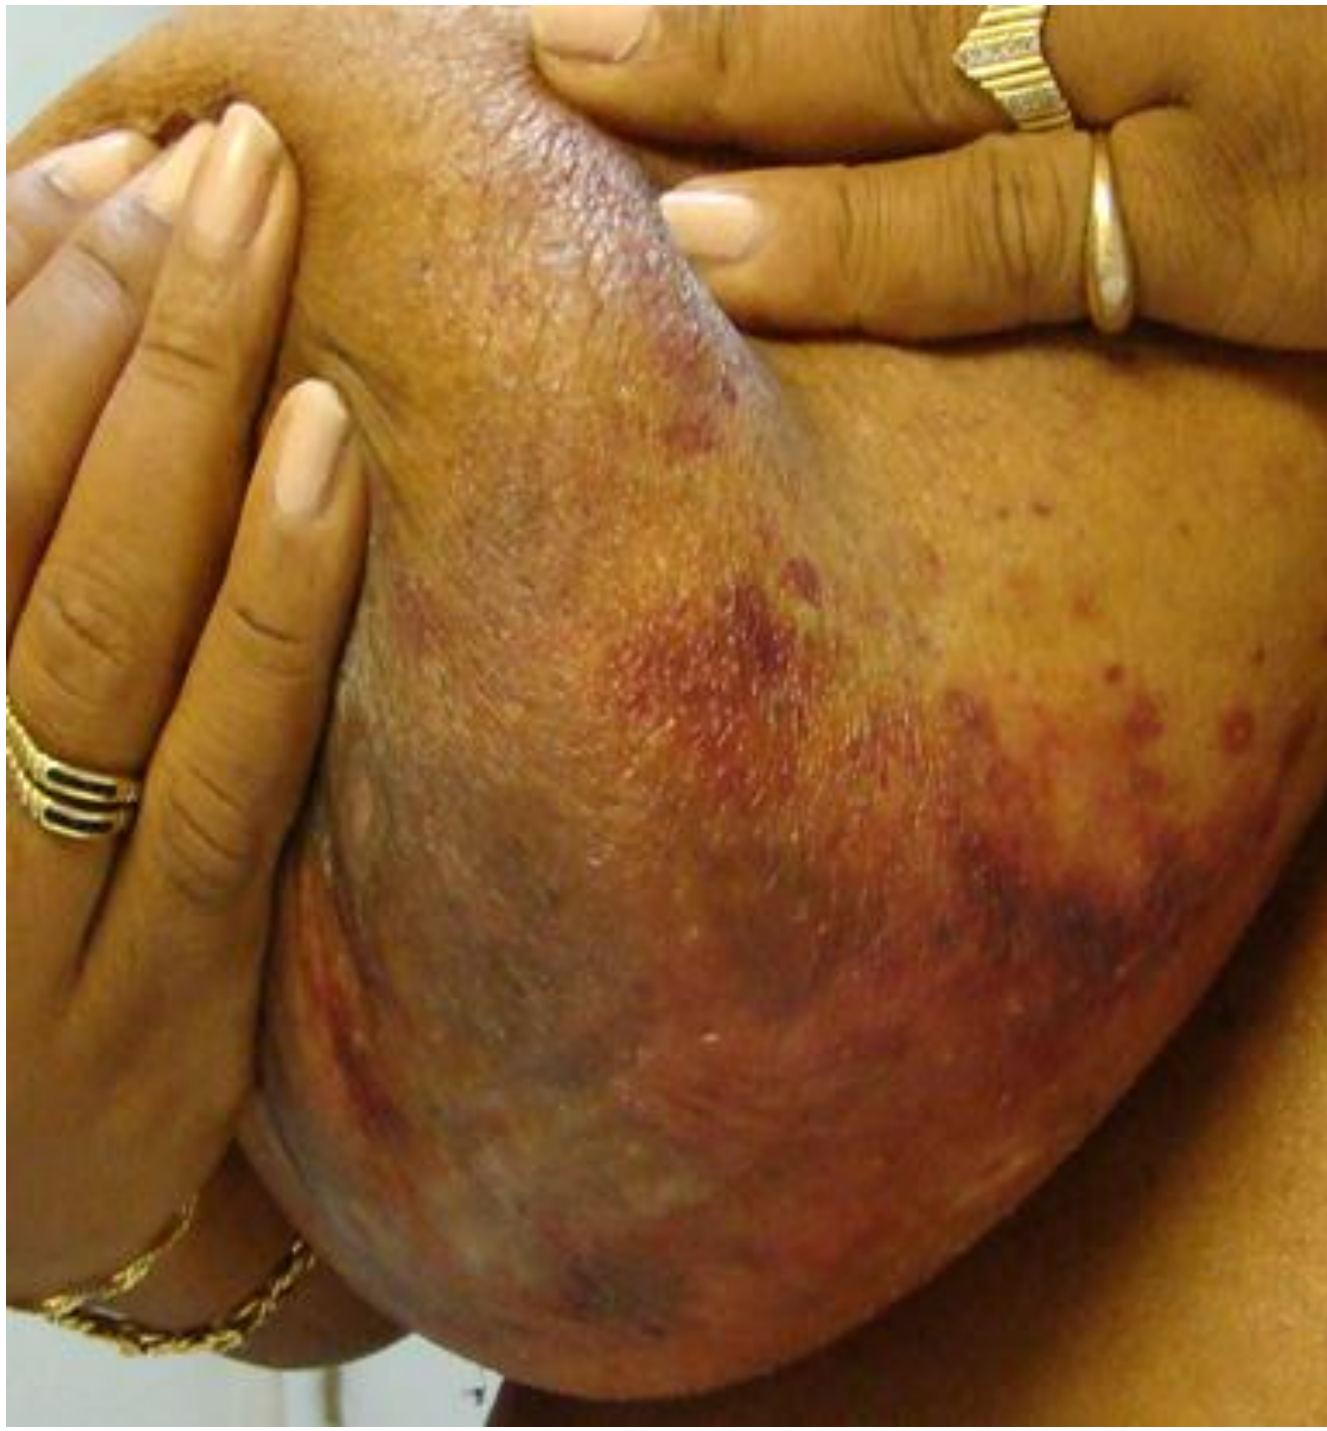

Supplement: MOESM1 [file 9687012]
